# Supplementary material
Source: PubMed Central journal article supplement (PMC8463503)
Supplement: NIHMS1735878-supplement-1.pdf [file NIHMS1735878-supplement-1.pdf]

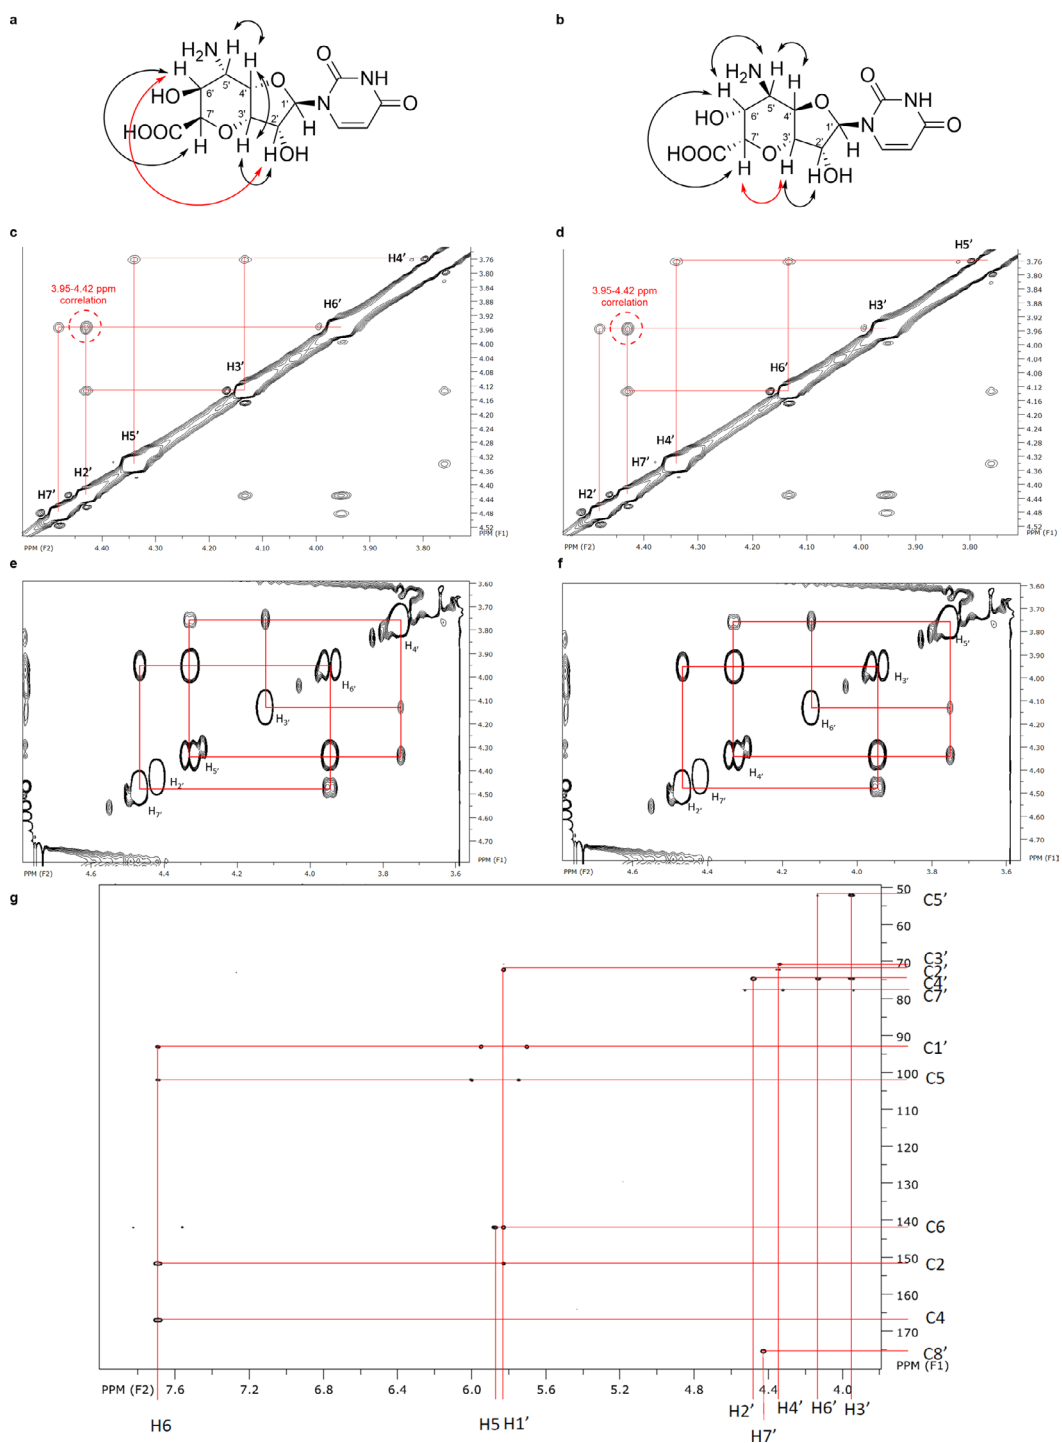

**Supplementary Figure 17.** Stereochemical revision of AHOA. **a** and **b**. Original (**a**) and revised (**b**) structure of AHOA with NOESY correlations shown in double-headed arrows (3.95–4.42 ppm correlation shown in red). **c** and **d**.  $^1\text{H}$ - $^1\text{H}$  NOESY spectrum of AHOA with the original (**c**) and revised (**d**) signal assignment. **e** and **f**.  $^1\text{H}$ - $^1\text{H}$  COSY spectrum of AHOA with original (**e**) and revised (**f**) signal assignments. **g**. HMBC spectrum of AHOA with the revised signal assignments.

Published online: 11 August 2021

<https://doi.org/10.1038/s41589-021-00867-7>

© The Author(s), under exclusive licence to Springer Nature America, Inc. 2021
